# Supplementary material for: Molecular and Functional Characterization of Different BrainSphere Models for Use in Neurotoxicity Testing on Microelectrode Arrays
Source: MDPI journal article supplement (doi:10.3390/cells12091270), 2023-04-27
Supplement: s1 [file s1]

1. Supplementary Tables

**Supplementary Table S1.** Coatings used for neural differentiation of BrainSpheres generated with different neural induction protocols.

| Neural induction protocol | Differentiation medium | coating                                         | Order number and supplier                                                                         |
|---------------------------|------------------------|-------------------------------------------------|---------------------------------------------------------------------------------------------------|
| 2D-NIM                    | CINDA+                 | 0.1 mg/mL PLO <sup>1</sup> / 50 µg/mL laminin   | PLO: #P4957, Sigma-Aldrich, St. Louis, MO, USA<br>laminin: #LN521, Biolamina, Sundbyberg, Sweden  |
|                           | Electro                | 0.1 % PEI <sup>2</sup> / 50 µg/mL laminin       | PEI: #181978, Sigma-Aldrich, St. Louis, MO, USA<br>laminin: #LN521, Biolamina, Sundbyberg, Sweden |
| GNEIB                     | CINDA+                 | 25 µg/mL laminin                                | laminin: #LN521, Biolamina, Sundbyberg, Sweden                                                    |
|                           | Electro                | 0.015 mg/mL PLO <sup>1</sup> / 50 µg/mL laminin | PLO: #P4957, Sigma-Aldrich, St. Louis, MO, USA<br>laminin: #LN521, Biolamina, Sundbyberg, Sweden  |
| Stemdiff                  | CINDA+                 | 50 µg/mL laminin                                | laminin: #LN521, Biolamina, Sundbyberg, Sweden                                                    |
|                           | Electro                | 0.1 mg/mL PLO <sup>1</sup> / 50 µg/mL laminin   | PLO: #P4957, Sigma-Aldrich, St. Louis, MO, USA<br>laminin: #LN521, Biolamina, Sundbyberg, Sweden  |

<sup>1</sup>PLO: poly-L-ornithine; <sup>2</sup>PEI: polyethyleneimine

**Supplementary Table S2.** Information about used compounds and their solvents.

| Compound                                 | CASRN      | Order number and supplier                                  | solvent          | effect                        |
|------------------------------------------|------------|------------------------------------------------------------|------------------|-------------------------------|
| Bicuculline                              | 485-49-4   | #0130, Tocris, Bristol, UK                                 | DMSO             | GABA <sub>A</sub> antagonist  |
| Buspirone hydrochloride                  | 33386-08-2 | #HY-B1115, MedChemExpress, South Brunswick, NJ, USA        | DMSO             | 5-HT <sub>1A</sub> agonist    |
| Carbaryl                                 | 63-25-2    | #32055, Sigma-Aldrich, St. Louis, MO, USA                  | DMSO             | inhibits acetylcholinesterase |
| DL-2-amino-5-phosphonovaleric acid (AP5) | 76326-31-3 | #SC-201503, Santa Cruz Biotechnology Inc., Dallas, TX, USA | H <sub>2</sub> O | NMDA antagonist               |

|                             |             |                                                            |                  |                                                    |
|-----------------------------|-------------|------------------------------------------------------------|------------------|----------------------------------------------------|
| Emamectin benzoate          | 155569-91-8 | #31733, Merck, Darmstadt, Germany                          | DMSO             | GABA <sub>A</sub> and GABA <sub>C</sub> agonist    |
| Haloperidol                 | 52-86-8     | #HY-14538, MedChemExpress, South Brunswick, NJ, USA        | DMSO             | D2 antagonist                                      |
| L-glutamate                 | 6106-04-3   | #49621, Sigma-Aldrich, St. Louis, MO, USA                  | H <sub>2</sub> O | Neurotransmitter                                   |
| NBQX disodium salt (NBQX)   | 479347-86-9 | #SC-222048, Santa Cruz Biotechnology Inc., Dallas, TX, USA | DMSO             | AMPA antagonist                                    |
| Picrotoxin                  | 124-87-8    | #SC-202765, Santa Cruz Biotechnology Inc., Dallas, TX, USA | DMSO             | GABA <sub>A</sub> and GABA <sub>C</sub> antagonist |
| Trimethyltin chloride (TMT) | 1066-45-1   | #146498, Merck, Darmstadt, Germany                         | H <sub>2</sub> O | Increases glutamate release                        |
| γ-Aminobutyric acid (GABA)  | 56-12-2     | #A5835, Sigma-Aldrich, St. Louis, MO, USA                  | H <sub>2</sub> O | Neurotransmitter                                   |

**Supplementary Table S3.** Primer sequences.

| Gene    | Forward primer sequence (5' → 3') | Reverse primer sequence (5' → 3') |
|---------|-----------------------------------|-----------------------------------|
| ACHE    | GTCCAGACTAACGTACTGCT              | ATGCGATACTGGGCCAAC                |
| ACTB    | CAGGAAGTCCCTTGCCATCC              | ACCAAAAGCCTTCATACATCTCA           |
| AQP4    | TGGACAGAAGACATACTCATAAAGG         | GGTGCCAGCATGAATCCC                |
| CHAT    | GCCCATAGTATTGCTTCATGC             | ACCAGCTGAGGTTTGCAG                |
| CHRNA4  | CTCGCGGGCTCTAGATG                 | CCACAGGAGAAGACGAACC               |
| DLG4    | CCAGAAGAGTACAGCCGATTCT            | CTTGGTCTTGTCGTAATCAAACAG          |
| DRD2    | ACGGCGAGCATCCTGAACTT              | GCCGGGTTGGCAATGATGCA              |
| EN1     | CTGGGTGTACTGCACACGTTAT            | TACTCGCTCTCGTCTTTGTCTT            |
| FOXG1   | TCCATCCGCCACAATCTGTC              | CCCAGCGAGTTCTGAGTCAA              |
| GABRA1  | ACAACACTTACGCTCCAACA              | TTTCGGGCTTGACCTCTTTAG             |
| GAD1    | GACCCCAATACCACTAACCTG             | GCTGTTGGTCTTTGCAAG                |
| GFAP    | CACTGTGAGGCAGAAGCTC               | CCTCCAGCGACTCAATCTTC              |
| GLS     | CAGTTCCAAGATCATTAACAGCA           | CGATTGTGGGGTGTGTCT                |
| GRIA1   | CTTAATCGAGTTCTGCTACAAATCC         | GTATGGCTTCGTTGATGGATTG            |
| GRIN1   | CTCCTGGAAGATTGAGCTCAA             | GTGGATGGCTAACTAGGATGG             |
| HOXA2   | CACCACGTCTACGGGCAAGAAC            | AGCTGCTGATGCTGACTTCTGA            |
| HTR1A   | TGTCGCTTCTCACAACCTCTC             | CTTCTCCTCTTCTCTCTGCTC             |
| LMX1A   | CGGGTCATCTTGACAGGTTT              | CAGAAGCAGCTCAGGTGGTA              |
| MAP2    | TGCCTCAGAACAGACTGTCAC             | AAGGCTCAGCTGTAGAGGGA              |
| S100B   | CACATTCGCCGTCTCCATC               | CACAAGCTGAAGAAATCCGAAC            |
| SLC12A2 | ACAAAGTTGAGGAAGAGGATGGC           | CCTGATCTGCCGGTATGTCTTGG           |
| SLC12A5 | CCGATGACAATTACCCATGGA             | CTGTCTACATCAGCTCCGTTG             |
| SLC17A6 | CCTCTACCCTAAATATGCTAATTCCA        | TTGCTCCATATCCCATGACAT             |
| SLC17A7 | CAGAAAGCCCAGTTCAGC                | ACAATAGCAAAGCCGAAACTC             |
| SYN1    | GTGCTGCTGGTCATCGAC                | CCACAAGGTTGAGATCAGAGAA            |
| TH      | GGTCTCTAGATGGTGGATTTTG            | TGCTAAACCTGCTCTTCTCC              |
| TPH1    | TGTCTCACATATTGAGTGCAGT            | CCACAATTGGAAGATGTCTCC             |
