# Supplementary material for: Molecular and Functional Characterization of Different BrainSphere Models for Use in Neurotoxicity Testing on Microelectrode Arrays
Source: Cells. 2023 Apr 27;12(9):1270. doi: 10.3390/cells12091270 (PMC10177384; doi:10.3390/cells12091270)
Supplement: Supplementary file 1 [file cells-12-01270-s001.zip › Hartmann et al 2023_Supplementary Table S4.xlsx]

## Sheet: Comparison to first time point
gene	comparison			2D-NIM CINDA+	2D-NIM Electro	GNEIB CINDA+	GNEIB Electro	Stemdiff CINDA+	Stemdiff Electro	legend
FOXG1	2D	vs.	3D	0.9085	0.8234	0.9943	0.9745	0.9801	0.9978	≤ 0.075
			3D-1w	0.9971	0.992	0.9724	0.017	0.7683	0.8949	≤ 0.05
			3D-2w	0.9985	0.9992	>0.9999	0.3716	0.8477	0.3798	≤ 0.01
			3D-3w	>0.9999	0.9999	0.9998	0.0032	0.9234	0.4432	≤ 0.001
LMX1A	2D	vs.	3D	0.9986	0.9985	0.9972	0.9966	>0.9999	>0.9999
			3D-1w	0.841	0.8492	0.733	0.7318	0.3885	0.9998
			3D-2w	0.4581	0.5646	0.183	0.2276	0.1988	0.9777
			3D-3w	0.999	0.8508	0.0508	0.1159	0.3263	0.3139
EN1	2D	vs.	3D	0.7124	0.6649	0.9993	0.9997	0.0163	0.0176
			3D-1w	0.9537	0.8693	0.9998	0.9968	0.008	0.0074
			3D-2w	0.9861	0.9918	0.6417	0.9739	0.0074	0.0085
			3D-3w	0.9604	0.8133	0.4242	0.9706	0.0076	0.0113
HOXA2	2D	vs.	3D	0.0111	0.0208	0.0049	0.0055	0.3286	0.2558
			3D-1w	0.0006	0.0018	0.0006	0.0012	0.4368	0.2087
			3D-2w	0.0006	0.0034	0.0005	0.0009	0.1311	0.1206
			3D-3w	0.0011	0.0055	0.0006	0.0011	0.1024	0.0804
SLC12A2	2D	vs.	3D	0.9649	0.9706	0.9584	0.9907	0.6926	0.995
			3D-1w	0.3011	0.2782	0.6535	0.7932	0.9648	>0.9999
			3D-2w	0.214	0.4348	0.8121	0.8353	0.7855	0.9383
			3D-3w	0.1233	0.3784	0.5131	0.5024	0.906	0.6484
SLC12A5	2D	vs.	3D	>0.9999	>0.9999	>0.9999	>0.9999	0.9999	0.9999
			3D-1w	0.6468	0.6998	0.7279	0.8426	0.9384	0.8253
			3D-2w	0.0724	0.1397	0.6688	0.233	0.7777	0.2745
			3D-3w	0.0028	0.0021	0.1317	0.1242	0.3928	0.2496
MAP2	3D	vs.	3D-1w	0.3432	0.2087	0.0184	0.2745	0.4753	0.1347
			3D-2w	0.0917	0.0126	0.0274	0.0733	0.292	0.0227
			3D-3w	0.0052	0.0006	0.0107	0.0482	0.4586	0.0811
GFAP	3D	vs.	3D-1w	0.9902	0.8829	>0.9999	>0.9999	>0.9999	0.9326
			3D-2w	0.2129	0.1719	0.712	0.9706	0.9986	0.9024
			3D-3w	0.0067	0.0013	0.1623	0.1197	0.3103	0.0883
SYN1	3D	vs.	3D-1w	>0.9999	0.2743	0.7274	0.4212	>0.9999	0.6352
			3D-2w	0.9318	0.0344	0.5502	0.3389	0.996	0.5024
			3D-3w	0.3427	0.0087	0.1568	0.1967	0.254	0.2165
DRD2	3D	vs.	3D-1w	0.9002	0.9791	0.0547	0.1691	0.9342	0.9871
			3D-2w	0.6218	0.9772	0.1256	0.214	0.8719	0.902
			3D-3w	0.8165	0.9882	0.3368	0.3211	0.9403	0.6766
GABRA1	3D	vs.	3D-1w	0.9453	0.8227	0.89	>0.9999	0.9977	0.7664
			3D-2w	0.5603	0.4059	0.9954	0.8445	0.7559	0.5774
			3D-3w	0.0399	0.024	0.1417	0.0467	0.315	0.0852
GRIA1	3D	vs.	3D-1w	>0.9999	0.7465	0.6425	0.8869	0.9696	0.7773
			3D-2w	0.1513	0.3257	0.3275	0.7132	0.6674	0.3948
			3D-3w	<0,0001	0.0316	0.9941	0.595	0.2814	0.0677
DLG4	3D	vs.	3D-1w	0.9844	0.6375	0.8345	0.8022	0.9508	0.7698
			3D-2w	0.8235	0.9199	0.8225	0.9714	0.8509	0.8489
			3D-3w	0.5179	0.9875	0.6626	0.9812	0.7425	0.8505
GRIN1	3D	vs.	3D-1w	0.6971	0.2945	0.6288	0.6952	0.9774	0.7598
			3D-2w	0.0709	0.0075	0.4285	0.2053	0.583	0.2056
			3D-3w	0.0024	<0,0001	0.1006	0.1014	0.3554	0.0611
GAD1	3D	vs.	3D-1w	0.7971	0.9579	0.184	0.7619	0.8649	0.7943
			3D-2w	0.1774	0.2603	0.1051	0.0307	0.6434	0.3845
			3D-3w	0.023	0.0855	0.001	0.0029	0.4966	0.1619
S100b	3D	vs.	3D-1w	0.6053	0.7505	0.1063	0.0946	0.3935	0.9447
			3D-2w	0.1818	0.3265	0.0052	0.0095	0.0915	0.8807
			3D-3w	0.0338	0.0789	0.0002	0.0004	0.0354	0.3487
AQP4	3D	vs.	3D-1w	>0.9999	0.996	0.4973	0.6063	0.9995	0.8336
			3D-2w	0.9723	0.5207	0.2078	0.2454	0.7759	0.6125
			3D-3w	0.1782	0.0024	0.2021	0.1575	0.181	0.3784
GLS	3D	vs.	3D-1w	0.9975	0.8933	0.9841	0.8821	>0.9999	0.979
			3D-2w	0.568	0.4245	0.3916	0.9994	0.9573	0.9595
			3D-3w	0.5674	0.2172	0.0111	0.3972	0.8806	0.5963
TH	3D	vs.	3D-1w	0.6926	0.7843	0.0091	0.6568	0.9977	0.9771
			3D-2w	0.695	0.6931	0.0003	0.0984	0.995	0.9993
			3D-3w	0.832	0.9992	0.0003	0.0536	0.9525	0.9979
ACHE	3D	vs.	3D-1w	0.9012	0.9338	0.3322	0.9075	0.9859	0.9914
			3D-2w	0.6174	0.6915	0.0727	0.4573	0.7097	0.72
			3D-3w	0.3285	0.2655	0.0507	0.3233	0.5947	0.6549
CHRNA4	3D	vs.	3D-1w	0.552	0.8397	0.7072	0.8066	0.9878	0.9996
			3D-2w	0.4335	0.8632	0.6003	0.8254	0.9916	0.9147
			3D-3w	0.0951	0.0436	0.9867	0.7507	0.8038	0.9384
CHAT	3D	vs.	3D-1w	0.578	0.0488	0.9139	0.9997	0.9963	0.9817
			3D-2w	0.5784	0.1584	0.9266	0.959	0.635	0.8894
			3D-3w	0.0555	0.9805	0.9994	0.9659	0.5796	0.9913
HTR1A	3D	vs.	3D-1w	0.9403	0.4453	0.7454	0.8735	0.5935	0.9999
			3D-2w	0.4443	0.2537	0.9897	0.706	0.6944	0.8326
			3D-3w	0.0222	0.0316	0.957	0.9476	0.6272	0.9636
TPH1	3D	vs.	3D-1w	0.9867	0.9811	0.994	0.9773	0.6251	0.7427
			3D-2w	0.3754	0.7683	0.1518	0.4015	0.2204	0.0755
			3D-3w	0.9035	0.444	0.0399	0.0856	0.0047	0.392
SLC17A6	3D	vs.	3D-1w	0.9432	>0.9999	0.2624	0.9113	0.9939	>0.9999
			3D-2w	0.8353	0.9965	0.1996	0.5766	0.848	0.994
			3D-3w	0.4013	0.4368	0.1732	0.3549	0.7187	0.564
SLC17A7	3D	vs.	3D-1w	0.8912	0.9352	0.215	0.6334	0.9988	0.9804
			3D-2w	0.5879	0.6364	0.1704	0.2132	0.5176	0.9179
			3D-3w	0.7083	0.8872	0.4251	0.393	0.1069	0.5632

## Sheet: Comparison of the protocols
gene	time point	comparison
		2D-NIM CINDA+	2D-NIM CINDA+	2D-NIM CINDA+	2D-NIM CINDA+	2D-NIM CINDA+	2D-NIM Electro	2D-NIM Electro	2D-NIM Electro	2D-NIM Electro	GNEIB CINDA+	GNEIB CINDA+	GNEIB CINDA+	GNEIB Electro	GNEIB Electro	Stemdiff CINDA+
		vs.
		2D-NIM Electro	GNEIB CINDA+	GNEIB Electro	Stemdiff CINDA+	Stemdiff Electro	GNEIB CINDA+	GNEIB Electro	Stemdiff CINDA+	Stemdiff Electro	GNEIB Electro	Stemdiff CINDA+	Stemdiff Electro	Stemdiff CINDA+	Stemdiff Electro	Stemdiff Electro	legend
FOXG1	2D	/	0.0768	0.0768	0.3992	0.3992	0.0768	0.0768	0.3992	0.3992	/	0.5914	0.5914	0.5914	0.5914	/	≤ 0.075
	3D	/	0.0134	0.0134	0.0669	0.0669	0.0134	0.0134	0.0669	0.0669	/	0.1229	0.1229	0.1229	0.1229	/	≤ 0.05
	3D-1w	0.9908	0.1434	0.0092	0.3479	0.1789	0.1438	0.0098	0.3479	0.1789	0.2358	0.4167	0.2185	0.474	0.2559	0.8256	≤ 0.01
	3D-2w	0.9351	0.0684	<0,0001	0.2897	0.2353	0.0693	0.0003	0.2895	0.2352	0.2247	0.3494	0.2542	0.3835	0.2641	0.4147	≤ 0.001
	3D-3w	0.8825	0.046	0.0041	0.1868	0.2708	0.0473	0.0045	0.187	0.2709	0.0077	0.2408	0.2916	0.3651	0.3262	0.4333
LMX1A	2D	/	0.1773	0.1773	0.3761	0.3761	0.1773	0.1773	0.3761	0.3761	/	0.1691	0.1691	0.1691	0.1691	/
	3D	/	0.23	0.23	0.399	0.399	0.23	0.23	0.399	0.399	/	0.0553	0.0553	0.0553	0.0553	/
	3D-1w	0.9808	0.6342	0.658	0.7648	0.4633	0.6006	0.6222	0.7763	0.457	0.9337	0.254	0.1281	0.1999	0.0875	0.2414
	3D-2w	0.921	0.6285	0.7021	0.6559	0.5145	0.522	0.5818	0.7014	0.5292	0.8594	0.2471	0.1857	0.2043	0.1405	0.4493
	3D-3w	0.5254	0.1148	0.199	0.405	0.4763	0.1637	0.3077	0.8167	0.7674	0.7271	0.1385	0.3022	0.2517	0.4901	0.6385
EN1	2D	/	0.0731	0.0731	0.0639	0.0639	0.0731	0.0731	0.0639	0.0639	/	0.2163	0.2163	0.2163	0.2163	/
	3D	/	0.0965	0.0965	0.0423	0.0423	0.0965	0.0965	0.0423	0.0423	/	0.009	0.009	0.009	0.009	/
	3D-1w	0.8288	0.1528	0.1536	0.1106	0.1104	0.1305	0.1336	0.0915	0.0912	0.8938	0.153	0.1515	0.0375	0.0371	0.4979
	3D-2w	0.54	0.1305	0.1413	0.1096	0.1096	0.115	0.1215	0.1014	0.1015	0.4695	0.0731	0.0733	0.0987	0.099	0.8042
	3D-3w	0.8747	0.2047	0.2385	0.1902	0.1906	0.127	0.1471	0.118	0.1182	0.2131	0.0867	0.0889	0.1187	0.1203	0.5783
HOXA2	2D	/	0.094	0.094	0.0396	0.0396	0.094	0.094	0.0396	0.0396	/	0.0692	0.0692	0.0692	0.0692	/
	3D	/	0.0813	0.0813	0.0346	0.0346	0.0813	0.0813	0.0346	0.0346	/	0.0329	0.0329	0.0329	0.0329	/
	3D-1w	0.6589	0.1668	0.2979	0.1428	0.1381	0.1744	0.2551	0.1567	0.1518	0.2216	0.5562	0.2982	0.1421	0.1243	0.7239
	3D-2w	0.3516	0.1451	0.2382	0.1256	0.1306	0.1872	0.2208	0.1771	0.1796	0.2237	0.211	0.3133	0.1443	0.1617	0.5912
	3D-3w	0.5315	0.1739	0.2287	0.1529	0.1544	0.1717	0.202	0.1583	0.1593	0.2643	0.1793	0.1968	0.1487	0.1538	0.6269
SLC12A2	2D	/	0.6033	0.6033	0.1927	0.1927	0.6033	0.6033	0.1927	0.1927	/	0.2596	0.2596	0.2596	0.2596	/
	3D	/	0.5574	0.5574	0.4936	0.4936	0.5574	0.5574	0.4936	0.4936	/	0.2771	0.2771	0.2771	0.2771	/
	3D-1w	0.8206	0.1236	0.2723	0.4495	0.961	0.1182	0.2609	0.5265	0.8936	0.8709	0.1037	0.117	0.2366	0.268	0.5749
	3D-2w	0.6124	0.2241	0.2537	0.4661	0.5388	0.2723	0.2917	0.2539	0.6523	0.7977	0.1803	0.5696	0.2158	0.4781	0.4232
	3D-3w	0.3977	0.2019	0.2682	0.9683	0.452	0.2466	0.306	0.4124	0.5412	0.7517	0.199	0.7412	0.2667	0.5881	0.4498
SLC12A5	2D	/	0.2449	0.2449	0.0622	0.0622	0.2449	0.2449	0.0622	0.0622	/	0.1489	0.1489	0.1489	0.1489	/
	3D	/	0.5866	0.5866	0.9606	0.9606	0.5866	0.5866	0.9606	0.9606	/	0.6955	0.6955	0.6955	0.6955	/
	3D-1w	0.9767	0.6198	0.4821	0.7813	0.6473	0.6379	0.4976	0.7697	0.6333	0.8651	0.5998	0.4445	0.5472	0.3862	0.9432
	3D-2w	0.8268	0.1278	0.4003	0.9626	0.6481	0.2131	0.5438	0.9598	0.5829	0.4977	0.5508	0.2969	0.7375	0.4133	0.7035
	3D-3w	0.8247	0.189	0.2037	0.9698	0.8615	0.1483	0.1593	0.8932	0.7596	0.9275	0.5966	0.5313	0.6156	0.5559	0.938
MAP2	3D	/	0.797	0.797	0.4239	0.4239	0.797	0.797	0.4239	0.4239	/	0.3353	0.3353	0.3353	0.3353	/
	3D-1w	0.8901	0.8044	0.9192	0.3081	0.1822	0.9437	0.9845	0.3533	0.238	0.9349	0.351	0.1919	0.3677	0.282	0.9533
	3D-2w	0.5525	0.5018	0.9515	0.6082	0.3763	0.1487	0.5907	0.8463	0.5987	0.4539	0.4009	0.2066	0.6319	0.3964	0.8498
	3D-3w	0.5412	0.1438	0.3603	0.6643	0.5259	0.0534	0.1467	0.4616	0.2311	0.4831	0.7017	0.3341	0.9428	0.7623	0.9305
GFAP	3D	/	0.3207	0.3207	0.3358	0.3358	0.3207	0.3207	0.3358	0.3358	/	0.6584	0.6584	0.6584	0.6584	/
	3D-1w	0.2961	0.2294	0.2294	0.23	0.2294	0.2224	0.2224	0.2253	0.2224		0.4226		0.4226		0.4226
	3D-2w	0.242	0.2191	0.2189	0.2227	0.2185	0.1785	0.1757	0.2251	0.1718	0.7687	0.4713	0.4298	0.4456	0.5504	0.4117
	3D-3w	0.0847	0.0731	0.0733	0.0751	0.0728	0.0449	0.0448	0.9791	0.044	0.6066	0.4268	0.3679	0.436	0.3286	0.4181
SYN1	3D	/	0.391	0.391	0.6593	0.6593	0.391	0.391	0.6593	0.6593	/	0.391	0.391	0.391	0.391	/
	3D-1w	0.3967	0.3674	0.4022	0.3932	0.4332	0.4074	0.8904	0.9479	0.3971	0.4108	0.6434	0.1706	0.8793	0.5221	0.53
	3D-2w	0.4217	0.4153	0.4187	0.4402	0.4226	0.2116	0.6166	0.4039	0.9084	0.5732	0.288	0.3391	0.3429	0.6239	0.4257
	3D-3w	0.4205	0.4186	0.4192	0.5113	0.4215	0.2666	0.5229	0.4017	0.8149	0.7447	0.3923	0.5051	0.3954	0.6039	0.4065
DRD2	3D	/	0.7872	0.7872	0.3636	0.3636	0.7872	0.7872	0.3636	0.3636	/	0.0303	0.0303	0.0303	0.0303	/
	3D-1w	0.587	0.4821	0.8974	0.5092	0.4832	0.1533	0.346	0.7718	0.6736	0.2761	0.1366	0.1348	0.1469	0.11	0.8552
	3D-2w	0.5102	0.9941	0.656	0.4809	0.4806	0.1251	0.3635	0.8413	0.8378	0.2541	0.1025	0.1023	0.2194	0.2093	0.9985
	3D-3w	0.4778	0.9974	0.681	0.4287	0.5056	0.0888	0.323	0.7414	0.9192	0.2919	0.0671	0.1637	0.227	0.499	0.7315
GABRA1	3D	/	0.9505	0.9505	0.367	0.367	0.9505	0.9505	0.367	0.367	/	0.379	0.379	0.379	0.379	/
	3D-1w	0.8917	0.2483	0.2698	0.5192	0.8685	0.2993	0.3193	0.5172	0.9946	0.2229	0.3158	0.1613	0.3676	0.1755	0.3649
	3D-2w	0.8993	0.2391	0.2551	0.6525	0.5977	0.2044	0.2206	0.7102	0.641	0.2812	0.3427	0.2462	0.3735	0.2745	0.9658
	3D-3w	0.7511	0.1798	0.195	0.3958	0.3933	0.1353	0.1499	0.4751	0.4462	0.326	0.3685	0.1977	0.4248	0.2357	0.9345
GRIA1	3D	/	0.142	0.142	0.1156	0.1156	0.142	0.142	0.1156	0.1156	/	0.8003	0.8003	0.8003	0.8003	/
	3D-1w	0.2003	0.0038	0.2376	0.8331	0.2548	0.0473	0.0871	0.2889	0.7538	0.1376	0.3284	0.0928	0.7381	0.1513	0.2579
	3D-2w	0.4819	0.0122	0.1293	0.9503	0.208	0.0774	0.1411	0.7294	0.4379	0.1993	0.2668	0.0624	0.4791	0.0827	0.376
	3D-3w	0.982	0.0006	0.012	0.7626	0.5668	0.0711	0.0895	0.7833	0.569	0.3793	0.3368	0.2239	0.4246	0.2557	0.4964
DLG4	3D	/	0.9483	0.9483	0.6865	0.6865	0.9483	0.9483	0.6865	0.6865	/	0.7316	0.7316	0.7316	0.7316	/
	3D-1w	0.35	0.5871	0.3787	0.6696	0.4248	0.4189	0.2073	0.3936	0.2559	0.429	0.8053	0.4439	0.4083	0.4607	0.4305
	3D-2w	0.4277	0.7996	0.4436	0.8481	0.4484	0.4493	0.6181	0.4376	0.3032	0.4596	0.9403	0.4627	0.4492	0.8867	0.4527
	3D-3w	0.4327	0.8803	0.433	0.9899	0.4332	0.4373	0.9812	0.4378	0.9858	0.4375	0.8904	0.4377	0.4381	0.9938	0.4383
GRIN1	3D	/	0.0125	0.0125	0.1315	0.1315	0.0125	0.0125	0.1315	0.1315	/	0.0598	0.0598	0.0598	0.0598	/
	3D-1w	0.2557	0.4339	0.1579	0.8266	0.6478	0.6478	0.1808	0.4475	0.2701	0.3338	0.5405	0.6379	0.3558	0.1243	0.6603
	3D-2w	0.1495	0.1386	0.103	0.6981	0.4587	0.9722	0.1772	0.4244	0.3128	0.4442	0.4226	0.3215	0.3783	0.1857	0.5505
	3D-3w	0.1124	0.0881	0.0677	0.8686	0.2381	0.8706	0.0198	0.4678	0.5048	0.3472	0.4563	0.4845	0.3838	0.2321	0.5662
GAD1	3D	/	0.2838	0.2838	0.2509	0.2509	0.2838	0.2838	0.2509	0.2509	/	0.7691	0.7691	0.7691	0.7691	/
	3D-1w	0.7268	0.318	0.2887	0.9767	0.3034	0.3616	0.3132	0.8188	0.337	0.6634	0.4823	0.8527	0.4485	0.7835	0.4659
	3D-2w	0.96	0.0582	0.0656	0.6844	0.0504	0.1444	0.1758	0.6832	0.1517	0.2146	0.4557	0.6367	0.5414	0.5512	0.4888
	3D-3w	0.8628	0.1585	0.1743	0.5166	0.1479	0.242	0.2677	0.6346	0.232	0.4227	0.5329	0.877	0.5895	0.5436	0.5189
S100b	3D	/	0.2221	0.2221	0.195	0.195	0.2221	0.2221	0.195	0.195	/	0.3485	0.3485	0.3485	0.3485	/
	3D-1w	0.6717	0.4113	0.1546	0.1994	0.1313	0.7338	0.2924	0.3881	0.2394	0.304	0.4597	0.2287	0.2667	0.2477	0.0866
	3D-2w	0.5381	0.3553	0.1161	0.1513	0.0954	0.7799	0.1855	0.2811	0.1436	0.0549	0.0985	0.0325	0.2307	0.0684	0.0956
	3D-3w	0.5389	0.4633	0.1356	0.1573	0.1126	0.9213	0.1433	0.1858	0.1075	0.0002	0.0487	0.0018	0.4439	0.2244	0.2122
AQP4	3D	/	0.3645	0.3645	0.9137	0.9137	0.3645	0.3645	0.9137	0.9137	/	0.2701	0.2701	0.2701	0.2701	/
	3D-1w	0.6345	0.2825	0.2057	0.3715	0.5035	0.3812	0.2905	0.3805	0.9128	0.9428	0.2268	0.4046	0.1648	0.3092	0.2758
	3D-2w	0.7626	0.7561	0.8899	0.2349	0.35	0.4488	0.6351	0.0715	0.1083	0.8697	0.2199	0.4013	0.261	0.4048	0.4332
	3D-3w	0.871	0.3884	0.4077	0.3449	0.363	0.1175	0.1261	0.0941	0.0968	0.5822	0.0657	0.4909	0.1248	0.3272	0.5769
GLS	3D	/	0.9994	0.9994	0.9487	0.9487	0.9994	0.9994	0.9487	0.9487	/	0.9463	0.9463	0.9463	0.9463	/
	3D-1w	0.5177	0.5966	0.4519	0.8517	0.5791	0.7628	0.8316	0.6865	0.8712	0.5943	0.7816	0.9222	0.608	0.7176	0.7549
	3D-2w	0.612	0.6663	0.4521	0.5434	0.5238	0.6986	0.4293	0.7692	0.6883	0.2991	0.6184	0.5223	0.7461	0.7661	0.9579
	3D-3w	0.6214	0.7959	0.6274	0.5294	0.6284	0.219	0.9899	0.7378	0.9605	0.2442	0.2209	0.2974	0.769	0.9712	0.8226
TH	3D	/	0.007	0.007	0.0433	0.0433	0.007	0.007	0.0433	0.0433	/	0.7487	0.7487	0.7487	0.7487	/
	3D-1w	0.5703	0.9157	0.4715	0.4257	0.4195	0.1224	0.6272	0.4608	0.4409	0.0107	0.0155	0.017	0.3011	0.2502	0.7155
	3D-2w	0.6058	0.489	0.5596	0.4282	0.4293	0.0556	0.8776	0.4474	0.4507	0.0506	0.044	0.044	0.1409	0.1416	0.945
	3D-3w	0.4675	0.2671	0.6334	0.4149	0.4195	0.0005	0.2166	0.4905	0.5303	0.001	0.0038	0.003	0.1057	0.1064	0.8225
ACHE	3D	/	0.9405	0.9405	0.852	0.852	0.9405	0.9405	0.852	0.852	/	0.775	0.775	0.775	0.775	/
	3D-1w	0.5602	0.8232	0.6563	0.4787	0.4261	0.5306	0.806	0.7779	0.5895	0.7101	0.3666	0.2802	0.6044	0.463	0.7401
	3D-2w	0.5324	0.7347	0.734	0.5213	0.4246	0.4658	0.6408	0.9561	0.5811	0.9678	0.4751	0.1794	0.6254	0.4216	0.6737
	3D-3w	0.546	0.5692	0.6072	0.4405	0.3649	0.8917	0.8735	0.7035	0.4266	0.9425	0.5214	0.1155	0.6122	0.3928	0.6631
CHRNA4	3D	/	0.5268	0.5268	0.1337	0.1337	0.5268	0.5268	0.1337	0.1337	/	0.2241	0.2241	0.2241	0.2241	/
	3D-1w	0.3541	0.5459	0.7821	0.7645	0.5319	0.4454	0.5431	0.4022	0.3024	0.6617	0.6138	0.7177	0.9336	0.868	0.7416
	3D-2w	0.3693	0.5435	0.8534	0.5719	0.4822	0.4292	0.4601	0.3925	0.3445	0.5949	0.8179	0.9258	0.6648	0.5566	0.8642
	3D-3w	0.7	0.6444	0.7664	0.6132	0.684	0.844	0.9348	0.521	0.5234	0.8058	0.4822	0.4828	0.538	0.5543	0.8164
CHAT	3D	/	0.5099	0.5099	0.3819	0.3819	0.5099	0.5099	0.3819	0.3819	/	0.8692	0.8692	0.8692	0.8692	/
	3D-1w	0.3605	0.8972	0.7308	0.9728	0.7961	0.3754	0.3216	0.3558	0.0396	0.6662	0.9224	0.7176	0.7075	0.8421	0.769
	3D-2w	0.2359	0.8653	0.4113	0.5062	0.9248	0.2395	0.1644	0.3778	0.2831	0.3814	0.5324	0.801	0.4215	0.4902	0.4936
	3D-3w	0.0178	0.0493	0.0218	0.6685	0.1278	0.2706	0.5955	0.384	0.5026	0.5436	0.4507	0.9375	0.4089	0.7184	0.4436
HTR1A	3D	/	0.3637	0.3637	0.3883	0.3883	0.3637	0.3637	0.3883	0.3883	/	0.511	0.511	0.511	0.511	/
	3D-1w	0.325	0.192	0.4546	0.8303	0.4277	0.1904	0.5259	0.3	0.4694	0.4226	0.074	0.4082	0.4502	0.7597	0.425
	3D-2w	0.5535	0.5992	0.3437	0.6406	0.1954	0.7352	0.385	0.9105	0.9849	0.4987	0.7032	0.734	0.3748	0.3862	0.8686
	3D-3w	0.7764	0.4296	0.6138	0.2528	0.6611	0.2897	0.6816	0.1362	0.7193	0.4299	0.8033	0.497	0.3887	0.9842	0.4584
TPH1	3D	/	0.1642	0.1642	0.5506	0.5506	0.1642	0.1642	0.5506	0.5506	/	0.4911	0.4911	0.4911	0.4911	/
	3D-1w	0.71	0.88	0.5542	0.4852	0.4591	0.6366	0.4922	0.459	0.446	0.1171	0.0674	0.0678	0.4718	0.2888	0.6603
	3D-2w	0.9529	0.7396	0.5039	0.4392	0.4365	0.6743	0.5113	0.4397	0.4367	0.2183	0.187	0.1857	0.2388	0.2249	0.5206
	3D-3w	0.533	0.1719	0.9055	0.5208	0.4357	0.7876	0.5134	0.4454	0.4265	0.169	0.1426	0.1345	0.3252	0.2325	0.0626
SCL17A6	3D	/	0.8909	0.8909	0.0698	0.0698	0.8909	0.8909	0.0698	0.0698	/	0.2785	0.2785	0.2785	0.2785	/
	3D-1w	0.4876	0.722	0.7768	0.7538	0.6194	0.115	0.4578	0.4313	0.5426	0.3386	0.2927	0.1756	0.9671	0.6969	0.6906
	3D-2w	0.4871	0.9522	0.8794	0.851	0.5733	0.164	0.3422	0.4589	0.6219	0.7286	0.7153	0.2338	0.9508	0.4661	0.5872
	3D-3w	0.6047	0.6829	0.6776	0.6346	0.5375	0.7984	0.8492	0.9501	0.8594	0.9683	0.8674	0.5601	0.9069	0.6806	0.8128
SLC17A7	3D	/	0.2464	0.2464	0.0578	0.0578	0.2464	0.2464	0.0578	0.0578	/	0.3371	0.3371	0.3371	0.3371	/
	3D-1w	0.5546	0.3434	0.861	0.6662	0.5181	0.1534	0.2513	0.661	0.872	0.3433	0.1803	0.1517	0.3465	0.2229	0.4885
	3D-2w	0.5567	0.7109	0.9573	0.8527	0.8499	0.2567	0.2799	0.2293	0.5607	0.6663	0.7886	0.5026	0.8392	0.7303	0.6093
	3D-3w	0.4933	0.7814	0.9753	0.3925	0.7747	0.0703	0.2056	0.195	0.41	0.6607	0.4382	0.9076	0.3556	0.762	0.594
